# Supplementary material for: Identification of genic moss SSR markers and a comparative analysis of twenty-four algal and plant gene indices reveal species-specific rather than group-specific characteristics of microsatellites
Source: PubMed Central journal article supplement (PMC1526434; doi:10.1186/1471-2229-6-9), 2006-05-30
Supplement: 1471-2229-6-9-S1.pdf [file 1471-2229-6-9-S1.pdf]

|                               | <i>Chlamydomonas</i> | <i>Mesostigma</i> | <i>Physcomitrella</i> | <i>Tortula</i> | <i>Adiantum</i> | <i>Cycas</i> | <i>Ginko</i> | <i>Pinus</i> | <i>Picea</i> | <i>Aquilegia</i> |
|-------------------------------|----------------------|-------------------|-----------------------|----------------|-----------------|--------------|--------------|--------------|--------------|------------------|
| Number of basepairs examined  | 23802109             | 3752103           | 37672030              | 3303808        | 3818420         | 2003527      | 2152429      | 36548862     | 18454828     | 20095776         |
| No. of detected SSRs in total | 2975                 | 140               | 3723                  | 375            | 268             | 106          | 135          | 1515         | 873          | 4822             |
| No. of detected dimer SSRs    | 1647                 | 16                | 2095                  | 100            | 184             | 47           | 97           | 759          | 445          | 1483             |
| No. of detected trimer SSRs   | 1229                 | 59                | 1315                  | 251            | 78              | 53           | 34           | 678          | 388          | 3050             |
| No. of detected tetramer SSRs | 69                   | 53                | 273                   | 17             | 5               | 6            | 2            | 25           | 16           | 184              |
| No. of detected pentamer SSRs | 10                   | 11                | 39                    | 1              | 0               | 0            | 0            | 10           | 10           | 42               |
| No. of detected hexamer SSRs  | 20                   | 1                 | 1                     | 6              | 1               | 0            | 2            | 43           | 14           | 63               |
| Dimer counts/Mbp              | 69.2                 | 4.3               | 55.6                  | 30.3           | 48.2            | 23.5         | 45.1         | 20.8         | 24.1         | 73.8             |
| Trimer counts/Mbp             | 51.6                 | 15.7              | 34.9                  | 76             | 20.4            | 26.5         | 15.8         | 18.6         | 21           | 151.8            |
| Tetramer counts/Mbp           | 2.9                  | 14.1              | 7.2                   | 5.1            | 1.3             | 3            | 0.9          | 0.7          | 0.9          | 9.2              |
| Pentamer counts/Mbp           | 0.4                  | 2.9               | 1                     | 0.3            | 0               | 0            | 0            | 0.3          | 0.5          | 2.1              |
| Hexamer counts/Mbp            | 0.8                  | 0.3               | 0                     | 1.8            | 0.3             | 0            | 0.9          | 1.1          | 0.8          | 3.1              |
| total SSRs counts/Mbp         | 125                  | 37.3              | 98.8                  | 113.5          | 70.2            | 52.9         | 62.7         | 41.5         | 47.3         | 240              |

Significantly deviating values from the average, calculated for the counts/Mbp, are displayed in grey shaded cells.

|                               | <i>Mesembryanthemum</i> | <i>Beta</i> | <i>Vitis</i> | <i>Populus</i> | <i>Medicago</i> | <i>Arabidopsis</i> | <i>Gossypium</i> | <i>Solanum</i> | <i>Helianthus</i> | <i>Allium</i> |
|-------------------------------|-------------------------|-------------|--------------|----------------|-----------------|--------------------|------------------|----------------|-------------------|---------------|
| Number of basepairs examined  | 6042657                 | 8011081     | 16980355     | 34854417       | 28175361        | 50086382           | 31581061         | 30473698       | 9811686           | 8741722       |
| No. of detected SSRs in total | 1444                    | 1047        | 1864         | 5138           | 3186            | 5689               | 2711             | 2653           | 1263              | 340           |
| No. of detected dimer SSRs    | 921                     | 463         | 933          | 2584           | 1156            | 1760               | 1268             | 962            | 507               | 110           |
| No. of detected trimer SSRs   | 458                     | 523         | 812          | 2300           | 1860            | 3861               | 1273             | 1578           | 689               | 215           |
| No. of detected tetramer SSRs | 20                      | 13          | 63           | 131            | 94              | 28                 | 89               | 50             | 52                | 10            |
| No. of detected pentamer SSRs | 12                      | 14          | 28           | 43             | 39              | 6                  | 32               | 17             | 5                 | 2             |
| No. of detected hexamer SSRs  | 33                      | 34          | 28           | 80             | 37              | 34                 | 49               | 46             | 10                | 3             |
| Dimer counts/Mbp              | 152.4                   | 57.8        | 55           | 74.1           | 41              | 35.1               | 40.2             | 31.6           | 51.7              | 12.6          |
| Trimer counts/Mbp             | 75.9                    | 65.3        | 47.9         | 66             | 66              | 77.1               | 40.3             | 51.8           | 70.2              | 24.6          |
| Tetramer counts/Mbp           | 3.3                     | 1.6         | 3.7          | 3.8            | 3.3             | 0.6                | 2.8              | 1.6            | 5.3               | 1.1           |
| Pentamer counts/Mbp           | 2                       | 1.7         | 1.6          | 1.2            | 1.4             | 0.1                | 1                | 0.6            | 0.5               | 0.2           |
| Hexamer counts/Mbp            | 5.5                     | 4.2         | 1.6          | 2.3            | 1.3             | 0.7                | 1.6              | 1.5            | 1                 | 0.3           |
| total SSRs counts/Mbp         | 239                     | 130.7       | 109.8        | 147.4          | 113.1           | 113.6              | 85.8             | 87.1           | 128.7             | 38.9          |

|                               | <i>Triticum</i> | <i>Hordeum</i> | <i>Saccharum</i> | <i>Oryza</i> |
|-------------------------------|-----------------|----------------|------------------|--------------|
| Number of basepairs examined  | 79823548        | 36054692       | 59153866         | 93862193     |
| No. of detected SSRs in total | 10440           | 5098           | 7359             | 24247        |
| No. of detected dimer SSRs    | 2996            | 1419           | 1937             | 4713         |
| No. of detected trimer SSRs   | 6860            | 3297           | 4900             | 18939        |
| No. of detected tetramer SSRs | 415             | 273            | 193              | 384          |
| No. of detected pentamer SSRs | 114             | 59             | 238              | 106          |
| No. of detected hexamer SSRs  | 55              | 50             | 91               | 105          |
| Dimer counts/Mbp              | 37.5            | 39.4           | 32.7             | 50.2         |
| Trimer counts/Mbp             | 85.9            | 91.4           | 82.8             | 201.8        |
| Tetramer counts/Mbp           | 5.2             | 7.6            | 3.3              | 4.1          |
| Pentamer counts/Mbp           | 1.4             | 1.6            | 4                | 1.1          |
| Hexamer counts/Mbp            | 0.7             | 1.4            | 1.5              | 1.1          |
| total SSRs counts/Mbp         | 130.8           | 141.3          | 124.4            | 258.3        |
