# Supplementary material for: Identification of genic moss SSR markers and a comparative analysis of twenty-four algal and plant gene indices reveal species-specific rather than group-specific characteristics of microsatellites
Source: PubMed Central journal article supplement (PMC1526434; doi:10.1186/1471-2229-6-9), 2006-05-30
Supplement: 1471-2229-6-9-S2.pdf [file 1471-2229-6-9-S2.pdf]

|                                        | <i>Chlamydomonas</i> | <i>Mesostigma</i> | <i>Physcomitrella</i> | <i>Tortula</i> | <i>Adiantum</i> | <i>Cykas</i> | <i>Ginko</i> | <i>Pinus</i> | <i>Picea</i> | <i>Aquilegia</i> |
|----------------------------------------|----------------------|-------------------|-----------------------|----------------|-----------------|--------------|--------------|--------------|--------------|------------------|
| Average SSR dimer length in basepairs  | 18.61                | 13                | 16.68                 | 15.8           | 16.95           | 14.63        | 19.43        | 24.47        | 23.39        | 19.87            |
| Standard deviation in basepairs        | 14.15                | 1.46              | 8.76                  | 5.41           | 6.38            | 7.19         | 10.85        | 20.67        | 17.41        | 10.21            |
| Average SSR trimer length in basepairs | 18.07                | 18.65             | 17.6                  | 18.43          | 16.58           | 15.68        | 16.4         | 16.67        | 16.61        | 18.58            |
| Standard deviation in basepairs        | 8.54                 | 16.77             | 4.01                  | 4.41           | 3.37            | 1.27         | 2.46         | 4.15         | 3.01         | 4.97             |

Significantly deviating values from the cumulative average are displayed in grey shaded cells.

|                                        | <i>Mesembryanthemum</i> | <i>Beta</i> | <i>Vitis</i> | <i>Medicago</i> | <i>Populus</i> | <i>Arabidopsis</i> | <i>Gossypium</i> | <i>Solanum</i> | <i>Helianthus</i> | <i>Allium</i> |
|----------------------------------------|-------------------------|-------------|--------------|-----------------|----------------|--------------------|------------------|----------------|-------------------|---------------|
| Average SSR dimer length in basepairs  | 22.57                   | 15.43       | 20.65        | 21.25           | 17.43          | 16.84              | 17.03            | 18.31          | 16.25             | 21.49         |
| Standard deviation in basepairs        | 18.74                   | 8.24        | 16.43        | 19.27           | 7.67           | 12.67              | 7.87             | 13.29          | 6.32              | 14.61         |
| Average SSR trimer length in basepairs | 18.5                    | 17.54       | 18.29        | 17.94           | 18.14          | 17.84              | 18.59            | 16.95          | 16.99             | 17.13         |
| Standard deviation in basepairs        | 4.85                    | 4.38        | 5.13         | 4.59            | 4.72           | 13.2               | 6.2              | 3.75           | 3.84              | 3.75          |

|                                        | <i>Triticum</i> | <i>Hordeum</i> | <i>Saccharum</i> | <i>Oryza</i> | Cumulative average |
|----------------------------------------|-----------------|----------------|------------------|--------------|--------------------|
| Average SSR dimer length in basepairs  | 20.46           | 20.31          | 19.33            | 17.82        | 18.67              |
| Standard deviation in basepairs        | 16.44           | 16.17          | 14.12            | 11.96        |                    |
| Average SSR trimer length in basepairs | 17.43           | 17.12          | 16.99            | 17.26        | 17.5               |
| Standard deviation in basepairs        | 5.44            | 3.36           | 3.69             | 4.2          |                    |
