# Supplementary material for: Identification of genic moss SSR markers and a comparative analysis of twenty-four algal and plant gene indices reveal species-specific rather than group-specific characteristics of microsatellites
Source: PubMed Central journal article supplement (PMC1526434; doi:10.1186/1471-2229-6-9), 2006-05-30
Supplement: 1471-2229-6-9-S3.pdf [file 1471-2229-6-9-S3.pdf]

|                                                  | <i>Chlamydomonas</i> | <i>Mesostigma</i> | <i>Physcomitrella</i> | <i>Tortula</i> | <i>Adiantum</i> | <i>Cycas</i> | <i>Ginko</i> |
|--------------------------------------------------|----------------------|-------------------|-----------------------|----------------|-----------------|--------------|--------------|
| No. of basepairs examined                        | 23802109             | 3752103           | 37672030              | 3303808        | 3818420         | 2003527      | 2152429      |
| No. of SSRs consisting of the motif AC/GT        | 817                  | 4                 | 863                   | 33             | 61              | 3            | 13           |
| No. of SSRs consisting of the motif AG/CT        | 531                  | 0                 | 903                   | 62             | 121             | 28           | 28           |
| No. of SSRs consisting of the motif AT/TA        | 112                  | 7                 | 307                   | 0              | 0               | 16           | 56           |
| No. of SSRs consisting of the motif CG/GC        | 187                  | 5                 | 22                    | 5              | 2               | 0            | 0            |
| Total no. of detected dimer SSRs                 | 1647                 | 16                | 2095                  | 100            | 184             | 47           | 97           |
| counts/Mbp of SSRs consisting of the motif AC/GT | 34,3                 | 1,1               | 22,9                  | 10             | 16              | 1,5          | 6            |
| counts/Mbp of SSRs consisting of the motif AG/CT | 22,3                 | 0                 | 24                    | 20             | 31,7            | 14           | 13           |
| counts/Mbp of SSRs consisting of the motif AT/TA | 4,7                  | 1,9               | 8,2                   | 0              | 0               | 8            | 26           |
| counts/Mbp of SSRs consisting of the motif CG/GC | 7,9                  | 1,3               | 0,6                   | 1,7            | 0,5             | 0            | 0            |
| Total dimer SSR counts/Mbp                       | 69,2                 | 4,3               | 55,6                  | 30,3           | 48,2            | 23,5         | 45,1         |

Significantly deviating values from the average, calculated for the counts/Mbp, are displayed in grey shaded cells.

|                                                  | <i>Pinus</i> | <i>Picea</i> | <i>Aquilegia</i> | <i>Mesembryanthemum</i> | <i>Beta</i> | <i>Vitis</i> | <i>Populus</i> |
|--------------------------------------------------|--------------|--------------|------------------|-------------------------|-------------|--------------|----------------|
| No. of basepairs examined                        | 36548862     | 18454828     | 20095776         | 6042657                 | 8011081     | 16980355     | 34854417       |
| No. of SSRs consisting of the motif AC/GT        | 52           | 34           | 85               | 33                      | 42          | 55           | 336            |
| No. of SSRs consisting of the motif AG/CT        | 228          | 101          | 1219             | 833                     | 364         | 561          | 1559           |
| No. of SSRs consisting of the motif AT/TA        | 472          | 308          | 178              | 49                      | 54          | 316          | 665            |
| No. of SSRs consisting of the motif CG/GC        | 7            | 2            | 1                | 6                       | 3           | 1            | 24             |
| Total no. of detected dimer SSRs                 | 759          | 445          | 1483             | 921                     | 463         | 933          | 2584           |
| counts/Mbp of SSRs consisting of the motif AC/GT | 1,4          | 1,8          | 4,2              | 5,5                     | 5,2         | 3,2          | 9,6            |
| counts/Mbp of SSRs consisting of the motif AG/CT | 6,2          | 5,5          | 60,7             | 137,9                   | 45,6        | 33           | 44,7           |
| counts/Mbp of SSRs consisting of the motif AT/TA | 12,9         | 16,7         | 8,9              | 8,1                     | 6,7         | 18,6         | 19,1           |
| counts/Mbp of SSRs consisting of the motif CG/GC | 0,2          | 0,1          | 0,05             | 1                       | 0,4         | 0,1          | 0,7            |
| Total dimer SSR counts/Mbp                       | 20,8         | 24,1         | 73,8             | 152,4                   | 57,8        | 55           | 74,1           |

|                                                  | <i>Medicago</i> | <i>Arabidopsis</i> | <i>Gossypium</i> | <i>Solanum</i> | <i>Helianthus</i> | <i>Allium</i> | <i>Triticum</i> | <i>Hordeum</i> |
|--------------------------------------------------|-----------------|--------------------|------------------|----------------|-------------------|---------------|-----------------|----------------|
| No. of basepairs examined                        | 28175361        | 50086382           | 31581061         | 30473698       | 9811686           | 8741722       | 79823548        | 36054692       |
| No. of SSRs consisting of the motif AC/GT        | 143             | 173                | 145              | 123            | 108               | 32            | 782             | 353            |
| No. of SSRs consisting of the motif AG/CT        | 658             | 1347               | 437              | 329            | 300               | 19            | 1683            | 781            |
| No. of SSRs consisting of the motif AT/TA        | 331             | 235                | 652              | 509            | 97                | 58            | 338             | 189            |
| No. of SSRs consisting of the motif CG/GC        | 24              | 5                  | 34               | 1              | 2                 | 1             | 193             | 96             |
| Total no. of detected dimer SSRs                 | 1156            | 1760               | 1268             | 962            | 507               | 110           | 2996            | 1419           |
| counts/Mbp of SSRs consisting of the motif AC/GT | 5,1             | 3,5                | 4,6              | 4              | 11                | 3,7           | 9,8             | 9,8            |
| counts/Mbp of SSRs consisting of the motif AG/CT | 23,4            | 26,9               | 13,8             | 10,8           | 30,6              | 2,2           | 21,1            | 21,7           |
| counts/Mbp of SSRs consisting of the motif AT/TA | 11,7            | 4,7                | 20,6             | 16,7           | 9,9               | 8,6           | 4,2             | 5,2            |
| counts/Mbp of SSRs consisting of the motif CG/GC | 0,9             | 1                  | 1,1              | 0              | 0,2               | 0             | 2,4             | 2,7            |
| Total dimer SSR counts/Mbp                       | 41              | 35,1               | 40,2             | 31,6           | 51,7              | 12,6          | 37,5            | 39,4           |

|                                                  | <i>Saccharum</i> | <i>Oryza</i> |
|--------------------------------------------------|------------------|--------------|
| No. of basepairs examined                        | 59153866         | 93862193     |
| No. of SSRs consisting of the motif AC/GT        | 354              | 630          |
| No. of SSRs consisting of the motif AG/CT        | 986              | 3008         |
| No. of SSRs consisting of the motif AT/TA        | 425              | 523          |
| No. of SSRs consisting of the motif CG/GC        | 172              | 552          |
| Total no. of detected dimer SSRs                 | 1937             | 4713         |
| counts/Mbp of SSRs consisting of the motif AC/GT | 6                | 6,7          |
| counts/Mbp of SSRs consisting of the motif AG/CT | 16,7             | 32           |
| counts/Mbp of SSRs consisting of the motif AT/TA | 7,2              | 5,6          |
| counts/Mbp of SSRs consisting of the motif CG/GC | 2,9              | 5,9          |
| Total dimer SSR counts/Mbp                       | 32,7             | 50,2         |
