# Supplementary material for: Identification of genic moss SSR markers and a comparative analysis of twenty-four algal and plant gene indices reveal species-specific rather than group-specific characteristics of microsatellites
Source: PubMed Central journal article supplement (PMC1526434; doi:10.1186/1471-2229-6-9), 2006-05-30
Supplement: 1471-2229-6-9-S4.pdf [file 1471-2229-6-9-S4.pdf]

|                                                    | <i>Chlamydomonas</i> | <i>Mesostigma</i> | <i>Physcomitrella</i> | <i>Tortula</i> | <i>Adiantum</i> | <i>Cycas</i> | <i>Ginko</i> | <i>Pinus</i> |
|----------------------------------------------------|----------------------|-------------------|-----------------------|----------------|-----------------|--------------|--------------|--------------|
| No. of basepairs examined                          | 23802109             | 3752103           | 37672030              | 3303808        | 3818420         | 2003527      | 2152429      | 36548862     |
| No. of SSRs consisting of the motif AAC/GTT        | 21                   | 1                 | 138                   | 11             | 3               | 0            | 2            | 51           |
| No. of SSRs consisting of the motif AAG/CTT        | 28                   | 22                | 229                   | 21             | 10              | 22           | 7            | 130          |
| No. of SSRs consisting of the motif AAT/ATT        | 5                    | 4                 | 102                   | 1              | 0               | 7            | 9            | 93           |
| No. of SSRs consisting of the motif ACC/GGT        | 89                   | 0                 | 123                   | 17             | 15              | 2            | 5            | 54           |
| No. of SSRs consisting of the motif ACG/CGT        | 120                  | 5                 | 160                   | 45             | 5               | 0            | 0            | 42           |
| No. of SSRs consisting of the motif ACT/ATG        | 6                    | 1                 | 41                    | 8              | 21              | 1            | 3            | 30           |
| No. of SSRs consisting of the motif AGC/GCT        | 354                  | 6                 | 211                   | 104            | 5               | 12           | 2            | 113          |
| No. of SSRs consisting of the motif AGG/CCT        | 66                   | 13                | 228                   | 14             | 4               | 7            | 3            | 98           |
| No. of SSRs consisting of the motif AGT/ACT        | 9                    | 2                 | 71                    | 12             | 13              | 2            | 3            | 24           |
| No. of SSRs consisting of the motif CCG/CGG        | 531                  | 5                 | 12                    | 18             | 2               | 0            | 0            | 43           |
| Total no. of detected trimer SSRs                  | 1229                 | 59                | 1315                  | 251            | 78              | 53           | 34           | 678          |
| counts/Mbp of SSRs consisting of the motif AAC/GTT | 0,9                  | 0,3               | 3,7                   | 3,3            | 0,8             | 0            | 0,9          | 1,4          |
| counts/Mbp of SSRs consisting of the motif AAG/CTT | 1,2                  | 5,9               | 6,1                   | 6,4            | 2,6             | 11           | 3,3          | 3,6          |
| counts/Mbp of SSRs consisting of the motif AAT/ATT | 0,2                  | 1,1               | 2,7                   | 0,3            | 0               | 3,5          | 4,2          | 2,5          |
| counts/Mbp of SSRs consisting of the motif ACC/GGT | 3,7                  | 0                 | 3,3                   | 5,1            | 3,9             | 1            | 2,3          | 1,5          |
| counts/Mbp of SSRs consisting of the motif ACG/CGT | 5                    | 1,3               | 4,2                   | 13,6           | 1,3             | 0            | 0            | 1,1          |
| counts/Mbp of SSRs consisting of the motif ACT/ATG | 0,3                  | 0,3               | 1,1                   | 2,4            | 5,5             | 0,5          | 1,4          | 0,8          |
| counts/Mbp of SSRs consisting of the motif AGC/GCT | 14,9                 | 1,6               | 5,6                   | 31,5           | 1,3             | 6            | 0,9          | 3,1          |
| counts/Mbp of SSRs consisting of the motif AGG/CCT | 2,8                  | 3,5               | 6,1                   | 4,2            | 1               | 3,5          | 1,4          | 2,7          |
| counts/Mbp of SSRs consisting of the motif AGT/ACT | 0,4                  | 0,5               | 1,9                   | 3,6            | 3,4             | 1            | 1,4          | 0,7          |
| counts/Mbp of SSRs consisting of the motif CCG/CGG | 22,3                 | 1,3               | 0,3                   | 5,4            | 0,5             | 0            | 0            | 1,2          |
| Total trimer SSR counts/Mbp                        | 51,6                 | 15,7              | 34,9                  | 76             | 20,4            | 26,5         | 15,8         | 18,6         |

Significantly deviating values from the average, calculated for the counts/Mbp, are displayed in grey shaded cells.

|                                                    | <i>Picea</i> | <i>Aquilegia</i> | <i>Mesembryanthemum</i> | <i>Beta</i> | <i>Vitis</i> | <i>Populus</i> | <i>Medicago</i> | <i>Arabidopsis</i> |
|----------------------------------------------------|--------------|------------------|-------------------------|-------------|--------------|----------------|-----------------|--------------------|
| No. of basepairs examined                          | 18454828     | 20095776         | 6042657                 | 8011081     | 16980355     | 34854417       | 28175361        | 50086382           |
| No. of SSRs consisting of the motif AAC/GTT        | 15           | 386              | 67                      | 113         | 30           | 134            | 231             | 434                |
| No. of SSRs consisting of the motif AAG/CTT        | 68           | 1477             | 98                      | 87          | 231          | 550            | 655             | 1768               |
| No. of SSRs consisting of the motif AAT/ATT        | 83           | 142              | 26                      | 41          | 125          | 242            | 206             | 45                 |
| No. of SSRs consisting of the motif ACC/GGT        | 18           | 292              | 69                      | 62          | 97           | 304            | 162             | 237                |
| No. of SSRs consisting of the motif ACG/CGT        | 24           | 62               | 21                      | 20          | 37           | 198            | 67              | 76                 |
| No. of SSRs consisting of the motif ACT/ATG        | 19           | 254              | 49                      | 72          | 65           | 135            | 170             | 463                |
| No. of SSRs consisting of the motif AGC/GCT        | 40           | 98               | 29                      | 25          | 95           | 260            | 67              | 121                |
| No. of SSRs consisting of the motif AGG/CCT        | 86           | 76               | 29                      | 24          | 70           | 277            | 96              | 361                |
| No. of SSRs consisting of the motif AGT/ACT        | 13           | 261              | 58                      | 68          | 41           | 124            | 193             | 323                |
| No. of SSRs consisting of the motif CCG/CGG        | 22           | 2                | 12                      | 11          | 21           | 76             | 13              | 33                 |
| Total no. of detected trimer SSRs                  | 388          | 3050             | 458                     | 523         | 812          | 2300           | 1860            | 3861               |
| counts/Mbp of SSRs consisting of the motif AAC/GTT | 0,8          | 19,2             | 11,1                    | 14,1        | 8,7          | 8,2            | 3,8             | 1,8                |
| counts/Mbp of SSRs consisting of the motif AAG/CTT | 3,7          | 73,5             | 16,2                    | 10,9        | 35,3         | 23,2           | 15,8            | 13,6               |
| counts/Mbp of SSRs consisting of the motif AAT/ATT | 4,5          | 7,1              | 4,3                     | 5,1         | 0,9          | 7,3            | 6,9             | 7,4                |
| counts/Mbp of SSRs consisting of the motif ACC/GGT | 1            | 14,5             | 11,4                    | 7,7         | 4,7          | 5,8            | 8,7             | 5,7                |
| counts/Mbp of SSRs consisting of the motif ACG/CGT | 1,3          | 3,1              | 3,5                     | 2,5         | 1,5          | 2,4            | 5,7             | 2,2                |
| counts/Mbp of SSRs consisting of the motif ACT/ATG | 1            | 12,6             | 8,1                     | 9           | 9,2          | 6              | 3,9             | 3,8                |
| counts/Mbp of SSRs consisting of the motif AGC/GCT | 2,2          | 4,9              | 4,8                     | 3,1         | 2,4          | 2,4            | 7,5             | 5,6                |
| counts/Mbp of SSRs consisting of the motif AGG/CCT | 4,7          | 3,8              | 4,8                     | 3           | 7,2          | 3,4            | 7,9             | 4,1                |
| counts/Mbp of SSRs consisting of the motif AGT/ACT | 0,7          | 13               | 9,6                     | 8,5         | 6,4          | 6,9            | 3,6             | 2,4                |
| counts/Mbp of SSRs consisting of the motif CCG/CGG | 1,2          | 0,1              | 2                       | 1,4         | 0,7          | 0,5            | 2,2             | 1,2                |
| Total trimer SSR counts/Mbp                        | 21           | 151,8            | 75,9                    | 65,3        | 47,9         | 66             | 66              | 77,1               |

|                                                    | <i>Gossypium</i> | <i>Solanum</i> | <i>Helianthus</i> | <i>Allium</i> | <i>Triticum</i> | <i>Hordeum</i> | <i>Saccharum</i> | <i>Oryza</i> |
|----------------------------------------------------|------------------|----------------|-------------------|---------------|-----------------|----------------|------------------|--------------|
| No. of basepairs examined                          | 31581061         | 30473698       | 9811686           | 8741722       | 79823548        | 36054692       | 59153866         | 93862193     |
| No. of SSRs consisting of the motif AAC/GTT        | 102              | 190            | 40                | 12            | 468             | 83             | 137              | 165          |
| No. of SSRs consisting of the motif AAG/CTT        | 341              | 455            | 105               | 47            | 502             | 266            | 190              | 891          |
| No. of SSRs consisting of the motif AAT/ATT        | 158              | 201            | 90                | 16            | 73              | 34             | 50               | 110          |
| No. of SSRs consisting of the motif ACC/GGT        | 139              | 181            | 188               | 13            | 427             | 202            | 332              | 1113         |
| No. of SSRs consisting of the motif ACG/CGT        | 62               | 52             | 33                | 12            | 523             | 269            | 477              | 1474         |
| No. of SSRs consisting of the motif ACT/ATG        | 120              | 132            | 75                | 18            | 206             | 110            | 122              | 311          |
| No. of SSRs consisting of the motif AGC/GCT        | 86               | 102            | 50                | 38            | 920             | 468            | 692              | 2003         |
| No. of SSRs consisting of the motif AGG/CCT        | 66               | 92             | 29                | 33            | 1041            | 519            | 615              | 2830         |
| No. of SSRs consisting of the motif AGT/ACT        | 144              | 96             | 49                | 16            | 128             | 67             | 51               | 170          |
| No. of SSRs consisting of the motif CCG/CGG        | 55               | 76             | 30                | 10            | 2572            | 1279           | 2234             | 9872         |
| Total no. of detected trimer SSRs                  | 1273             | 1578           | 689               | 215           | 6860            | 3297           | 4900             | 18939        |
| counts/Mbp of SSRs consisting of the motif AAC/GTT | 3,22             | 6,2            | 4,1               | 1,4           | 5,9             | 2,3            | 2,3              | 1,8          |
| counts/Mbp of SSRs consisting of the motif AAG/CTT | 10,8             | 14,9           | 10,7              | 5,4           | 6,3             | 7,4            | 3,2              | 9,5          |
| counts/Mbp of SSRs consisting of the motif AAT/ATT | 5                | 6,6            | 9,2               | 1,8           | 0,9             | 0,9            | 0,8              | 1,2          |
| counts/Mbp of SSRs consisting of the motif ACC/GGT | 4,4              | 5,9            | 19,22             | 1,5           | 5,3             | 5,6            | 5,6              | 11,9         |
| counts/Mbp of SSRs consisting of the motif ACG/CGT | 2                | 1,7            | 3,4               | 1,4           | 6,6             | 7,5            | 8,1              | 15,7         |
| counts/Mbp of SSRs consisting of the motif ACT/ATG | 3,8              | 4,3            | 7,6               | 2,1           | 2,6             | 3,1            | 2,1              | 3,3          |
| counts/Mbp of SSRs consisting of the motif AGC/GCT | 2,7              | 3,3            | 5,1               | 4,3           | 11,5            | 13             | 11,7             | 21,3         |
| counts/Mbp of SSRs consisting of the motif AGG/CCT | 2,1              | 3              | 3                 | 3,8           | 13              | 14,4           | 10,4             | 30,2         |
| counts/Mbp of SSRs consisting of the motif AGT/ACT | 4,6              | 3,2            | 5                 | 1,8           | 11,6            | 1,9            | 0,9              | 1,8          |
| counts/Mbp of SSRs consisting of the motif CCG/CGG | 1,5              | 2,5            | 3,1               | 1,1           | 32,2            | 35,5           | 37,8             | 105,2        |
| Total trimer SSR counts/Mbp                        | 40,3             | 51,8           | 70,2              | 24,6          | 85,9            | 91,4           | 82,8             | 201,8        |
