# Supplementary material for: Identification of genic moss SSR markers and a comparative analysis of twenty-four algal and plant gene indices reveal species-specific rather than group-specific characteristics of microsatellites
Source: PubMed Central journal article supplement (PMC1526434; doi:10.1186/1471-2229-6-9), 2006-05-30
Supplement: 1471-2229-6-9-S5.pdf [file 1471-2229-6-9-S5.pdf]

**Tabular summary of the analysed plant gene indices including plant species name, taxonomic clade, source of database, release date, release version if specified in brackets, total number of sequences, total size of the databases in basepairs, average sequence length in basepairs and the GC-content of the databases.**

| Species                                        | Taxonomic clade               | Database                       | Total number of sequences | Total size in basepairs | Average sequence length in basepairs | GC-content in percentage |
|------------------------------------------------|-------------------------------|--------------------------------|---------------------------|-------------------------|--------------------------------------|--------------------------|
| <i>Chlamydomonas reinhardtii</i>               | Green alga                    | TIGR, Release 09.04 (5.0)      | 31,608                    | 23,802,109              | 753                                  | 58.3                     |
| <i>Mesostigma viride</i>                       | Green alga                    | PlantGDB, Release 09.05 (149a) | 5,467                     | 3,752,103               | 686                                  | 51.7                     |
| <i>Physcomitrella patens</i>                   | Moss                          | COSMOSS, Release 03.04         | 48,961                    | 37,672,030              | 769                                  | 46.9                     |
| <i>Tortula ruralis</i>                         | Moss                          | COSMOSS, Release 03.04         | 4,866                     | 3,303,808               | 679                                  | 53.0                     |
| <i>Adiantum capillus-veneris</i>               | Fern                          | PlantGDB, Release 09.05 (149a) | 7,903                     | 3,818,420               | 483                                  | 44.3                     |
| <i>Cycas rumphii</i>                           | Fern palm                     | NYPG, Release 09.05            | 4,210                     | 2,003,527               | 476                                  | 46.8                     |
| <i>Ginkgo biloba</i>                           | Ginkgo                        | NYPG, Release 09.05            | 3,820                     | 2,152,429               | 563                                  | 40.0                     |
| <i>Pinus taeda</i>                             | Conifer                       | TIGR, Release 07.05 (6.0)      | 45,557                    | 36,548,862              | 802                                  | 43.8                     |
| <i>Picea spec.</i>                             | Conifer                       | TIGR, Release 09.04 (1.0)      | 27,194                    | 18,454,828              | 679                                  | 41.6                     |
| <i>Aquilegia formosa</i> x <i>A. pubescens</i> | Dicot, Ranunculales           | TIGR, Release 09.05 (2.0)      | 17,801                    | 20,095,776              | 1,129                                | 40.0                     |
| <i>Mesembryanthemum crystallinum</i>           | Dicot, Caryophyllales         | TIGR, Release 04.03 (3.0)      | 8,455                     | 6,042,657               | 715                                  | 43.8                     |
| <i>Beta vulgaris</i>                           | Dicot, Caryophyllales         | TIGR, Release 02.05 (1.2)      | 13,618                    | 8,011,081               | 588                                  | 41.9                     |
| <i>Vitis vinifera</i>                          | Dicot, Eurosid incertae sedis | TIGR, Release 09.04 (4.0)      | 23,871                    | 16,980,355              | 711                                  | 42.5                     |
| <i>Medicago truncatula</i>                     | Dicot, Fabales                | TIGR, Release 01.05 (8.0)      | 36,878                    | 28,175,361              | 764                                  | 39.4                     |
| <i>Populus spec.</i>                           | Dicot, Malpighiales           | TIGR, Release 01.05 (2.0)      | 54,756                    | 34,854,417              | 637                                  | 42.2                     |
| <i>Arabidopsis thaliana</i>                    | Dicot, Brassicales            | TIGR, Release 08.04 (12.1)     | 42,301                    | 50,086,382              | 1,184                                | 42.4                     |
| <i>Gossypium spec.</i>                         | Dicot, Malvales               | TIGR, Release 10.04 (6)        | 40,348                    | 31,581,061              | 783                                  | 43.3                     |
| <i>Solanum tuberosum</i>                       | Dicot, Solanales              | TIGR, Release 02.05 (10)       | 38,239                    | 30,473,698              | 797                                  | 40.4                     |
| <i>Helianthus annuus</i>                       | Dicot, Asterales              | TIGR, Release 08.03 (3.0)      | 20,520                    | 9,811,686               | 478                                  | 42.6                     |
| <i>Allium cepa</i>                             | Monocot, Asparagales          | TIGR, Release 07.04 (1)        | 11,726                    | 8,741,722               | 745                                  | 41.7                     |
| <i>Triticum aestivum</i>                       | Monocot, Poales               | TIGR, Release 02.05 (10)       | 122,282                   | 79,823,548              | 653                                  | 51.1                     |
| <i>Hordeum vulgare</i>                         | Monocot, Poales               | TIGR, Release 09.04 (9.0)      | 50,453                    | 36,054,692              | 715                                  | 52.5                     |
| <i>Saccharum officinarum</i>                   | Monocot, Poales               | TIGR, Release 10.04 (2.1)      | 78,547                    | 59,153,866              | 753                                  | 51.5                     |
| <i>Oryza sativa</i>                            | Monocot, Poales               | TIGR, Release 09.04 (16.0)     | 89,147                    | 93,862,193              | 1,053                                | 53.7                     |

Significantly deviating values from the average calculated for average sequence length and GC-content are displayed in grey shaded cells.
